# Supplementary material for: Stimulating the Hematopoietic Effect of Simulated Digestive Product of Fucoidan from Sargassum fusiforme on Cyclophosphamide-Induced Hematopoietic Damage in Mice and Its Protective Mechanisms Based on Serum Lipidomics
Source: MDPI journal article supplement (doi:10.3390/md20030201), 2022-03-09
Supplement: s1 [file s1]

# **Stimulating the hematopoietic effect of simulated digestive product of fucoidan from *Sargassum fusiforme* on cyclophosphamide-induced hematopoietic damage in mice and its protective mechanisms based on serum lipidomics**

Wei-Ping Ma <sup>1</sup>, Shi-Ning Yin <sup>2,3</sup>, Jia-Peng Chen <sup>1</sup>, Xi-Cheng Geng <sup>1</sup>, Ming-Fei Liu <sup>1</sup>, Hai-Hua Li <sup>1</sup> and Ming Liu <sup>1,4,\*</sup> and Hong-Bing Liu <sup>1,3,4,\*</sup>

*1 Key Laboratory of Marine Drugs, School of Medicine and Pharmacy, Ocean University of China, Qing-dao 266003, China. maweiping1990@163.com (Wei-Ping Ma); 21180831069@stu.ouc.edu.cn (Jia-Peng Chen); 21200811111@stu.ouc.edu.cn (Xi-Cheng Geng); 1661701601@qq.com (Ming-Fei Liu); shaixuan@ouc.edu.cn (Hai-Hua Li); lmouc@ouc.edu.cn (Ming Liu); liuhongb@ouc.edu.cn (Hong-Bing Liu).*

*2 Qingdao Institute for Food and Drug Control, Qingdao 266000, China. yinshining@126.com (Shi-Ning Yin).*

*3 NMPA Key Laboratory for Quality Research and Evaluation of Marine Traditional Chinese Medicine, Qingdao 266000, China.*

*4 Laboratory for Marine Drugs and Bioproducts, Pilot National Laboratory for Marine Science and Technology, Qingdao 266237, China.*

*\* Correspondence: +86 532 82031823, e-mail: liuhongb@ouc.edu.cn (Hong-Bing Liu); Tel.: +86 532 82031980, e-mail: lmouc@ouc.edu.cn (Ming Liu)*

**Table S1.** Effects of simulated digestive product of fucoidan from *Sargassum fusiforme* (DSFF) on the body weight gain.

| Groups    | First day    | Third day      | Fifth day      | Seventh day    | Eighth day                |
|-----------|--------------|----------------|----------------|----------------|---------------------------|
| Control   | 23.12 ± 2.33 | 27.09 ± 1.86   | 27.90 ± 1.79   | 28.09 ± 2.02   | 28.49 ± 2.14              |
| Model     | 23.00 ± 2.77 | 23.07 ± 1.37** | 24.37 ± 1.92** | 23.67 ± 1.32** | 24.24 ± 1.86**            |
| rhG-CSF   | 24.50 ± 2.76 | 23.73 ± 2.18** | 24.95 ± 2.22*  | 25.26 ± 2.40*  | 26.39 ± 2.32 <sup>#</sup> |
| 1.8 mg/kg | 23.67 ± 2.63 | 23.57 ± 1.14** | 23.13 ± 2.39** | 24.27 ± 1.56** | 24.66 ± 1.77**            |
| 3.6 mg/kg | 24.15 ± 2.91 | 23.49 ± 1.83** | 24.25 ± 1.89** | 24.42 ± 2.19** | 25.99 ± 3.19              |
| 7.2 mg/kg | 22.85 ± 2.51 | 22.92 ± 2.04** | 24.03 ± 1.45** | 23.69 ± 2.37** | 24.05 ± 4.41**            |

Data are the mean ± standard deviation ( $n=10$ ). \*  $p < 0.05$ , \*\*  $p < 0.01$ , vs. control; <sup>#</sup>  $p < 0.05$ , vs. model.
